# Supplementary material for: Engineering ROS-scavenging Prussian blue nanozymes for efficient atherosclerosis nanotherapy
Source: Royal Society of Chemistry journal article supplement (doi:10.1039/d2tb02661a), 2023-01-01
Supplement: d2tb02661a1.pdf [file d2tb02661a1.pdf]

## **Engineering ROS-Scavenging Prussian Blue Nanozymes for Efficient Atherosclerosis Nanotherapy**

*Xiaoying Chen<sup>a</sup>, Chen Dai<sup>a</sup>, Ruizhi Hu<sup>a</sup>, Luodan Yu<sup>\*b</sup>, Yu Chen<sup>\*b</sup> and Bo Zhang<sup>\*a</sup>*

<sup>a</sup>Department of Ultrasound, Shanghai East Hospital, Tongji University, Shanghai  
200120, P. R. China.

<sup>b</sup>Materdicine Lab, School of Life Sciences, Shanghai University, Shanghai 200444, P. R.  
China.

## Supplementary figures

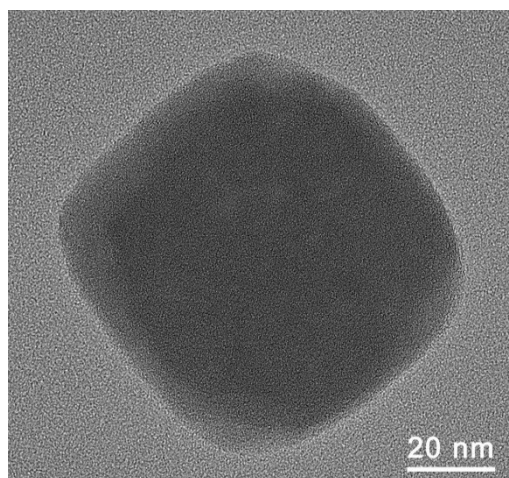

Figure S1. Bright-field TEM image of a single n-PBE.

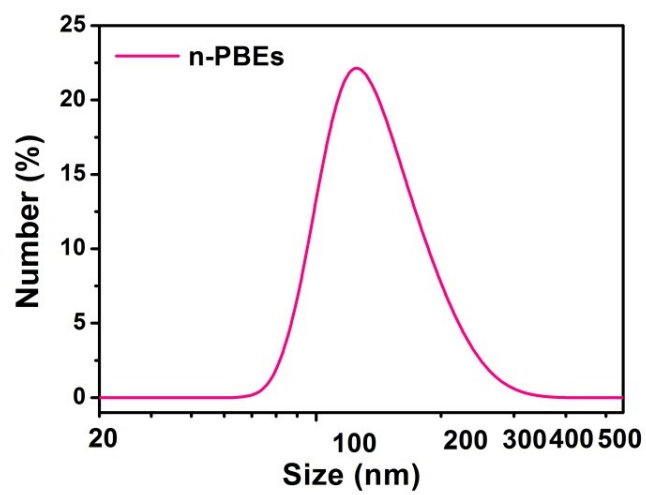

Figure S2. Dynamic light scattering of n-PBEs in aqueous solution.

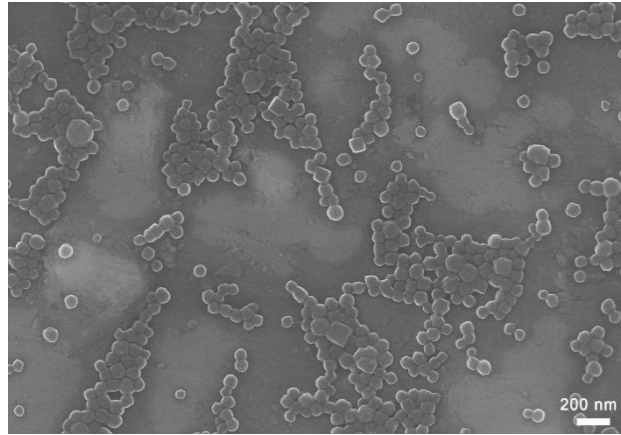

Figure S3. SEM image of n-PBEs.

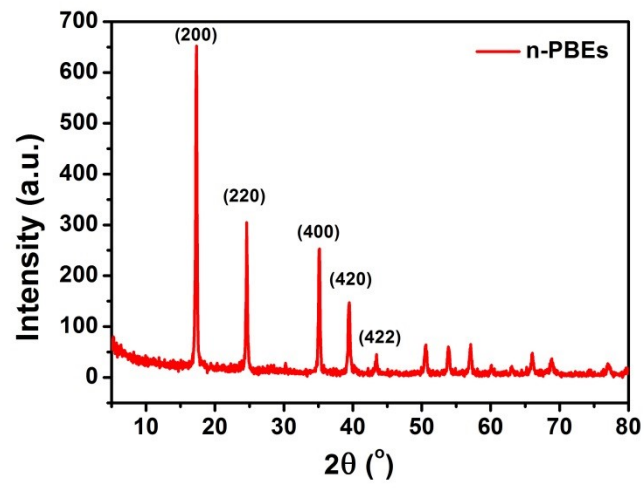

Figure S4. XRD pattern of n-PBEs.

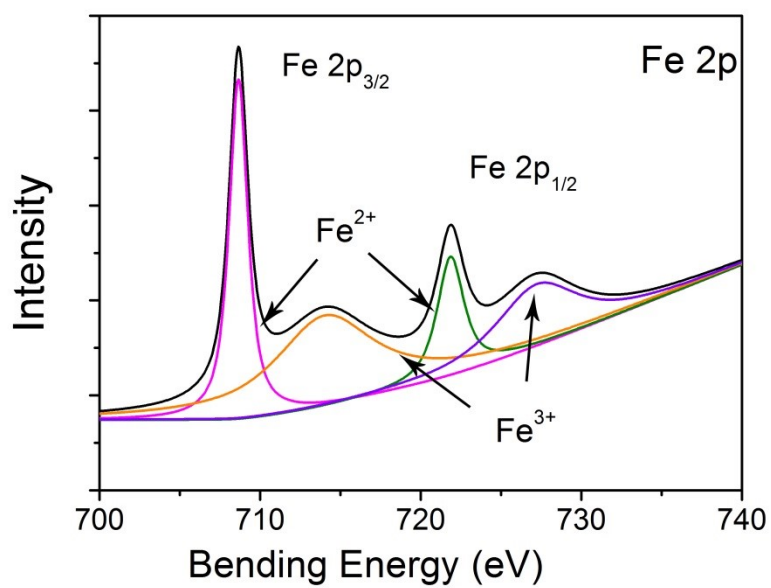

Figure S5. XPS spectra of n-PBEs in Fe 2p region.

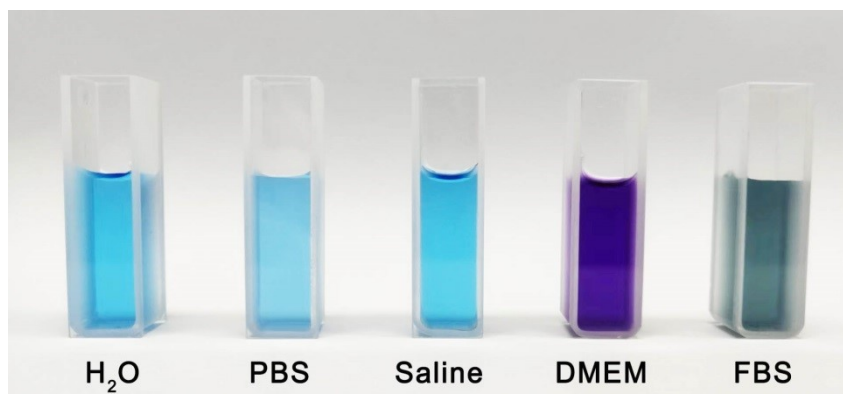

Figure S6. Digital image of n-PBEs dispersed in different physiological solutions.

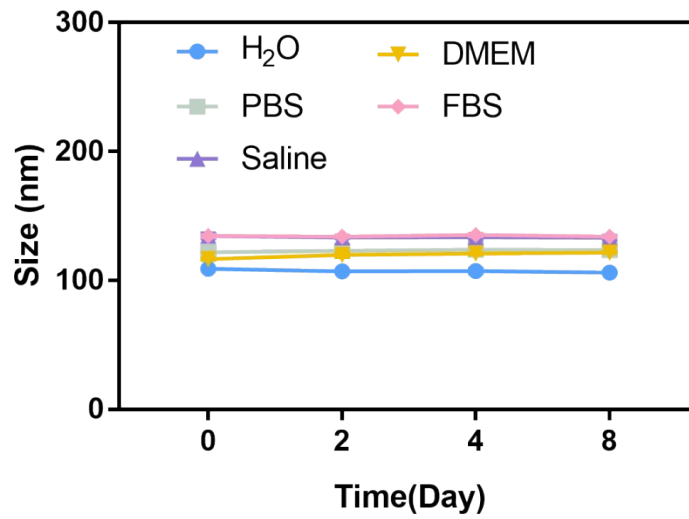

Figure S7. DLS change of n-PBEs in saline during one-week period.

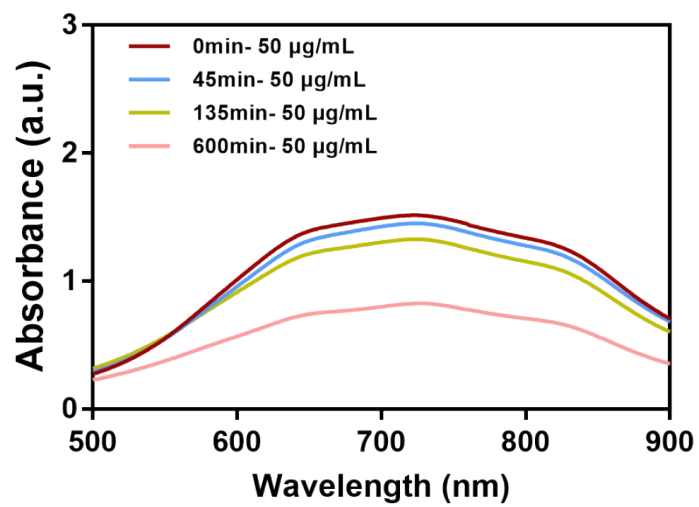

Figure S8. ABTS<sup>+</sup> elimination effect after treating n-PBEs with different time durations.

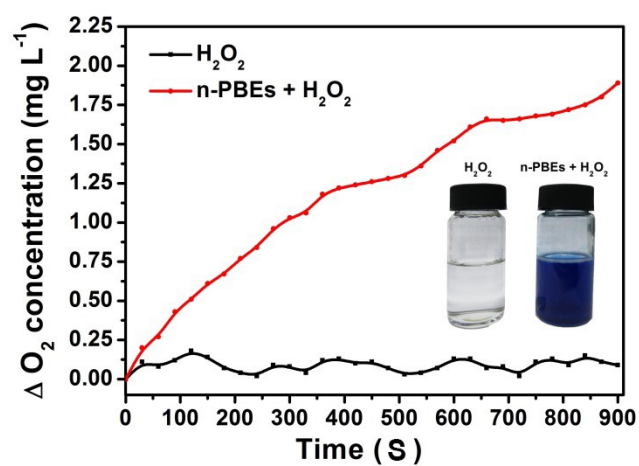

Figure S9. Aqueous O<sub>2</sub> concentration after dispersing n-PBEs into 1 mM of H<sub>2</sub>O<sub>2</sub> solution for 900 s.

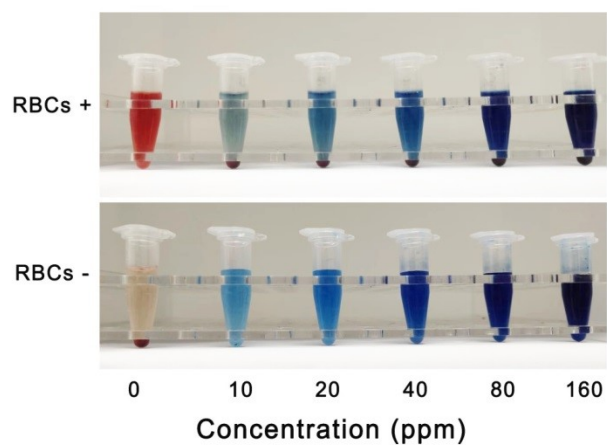

Figure S10. Hemolysis test of n-PBEs.

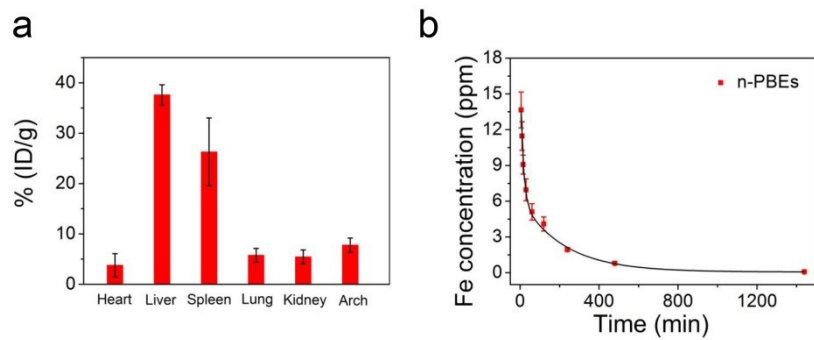

Figure S11. (a) Biodistribution assay and (b) blood circulation curve after the intravenous administration of n-PBEs into high-fat treated apoE<sup>-/-</sup> mice for 24 h (n = 3).
